# THE AMERICAN JOURNAL OF PSYCHIATRY

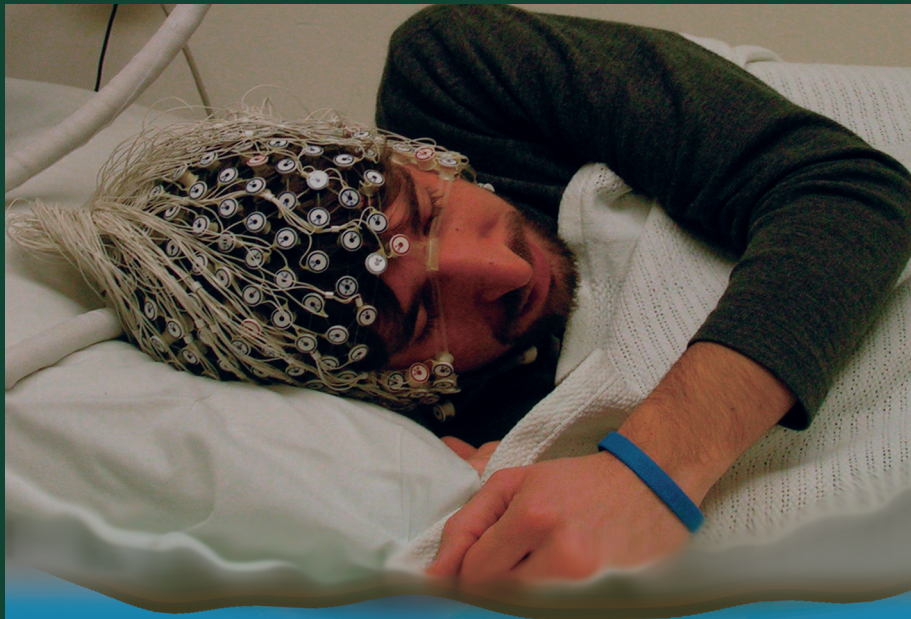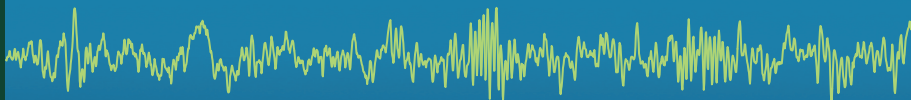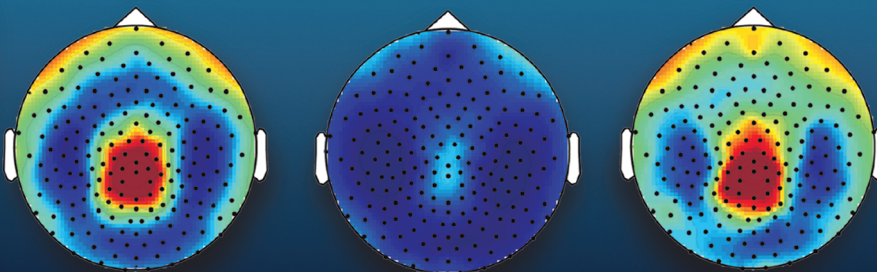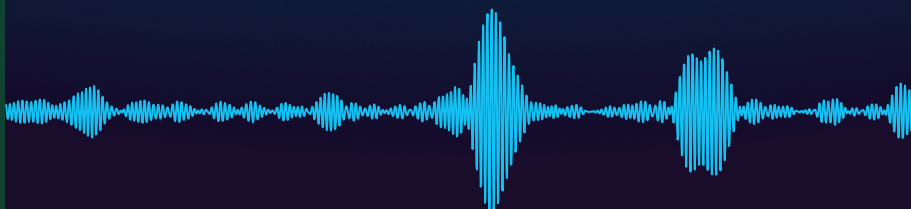

## Schizophrenia and Co-Occurring Substance Use Disorder

Alan I. Green et al.

402

## Effectiveness of Olanzapine, Quetiapine, and Risperidone in Patients With Chronic Schizophrenia After Discontinuing Perphenazine: A CATIE Study

T. Scott Stroup et al.

415

## Reduced Sleep Spindle Activity in Schizophrenia Patients

Fabio Ferrarelli et al.

483

## Significant Linkage to Compulsive Hoarding on Chromosome 14 in Families With Obsessive-Compulsive Disorder: Results From the OCD Collaborative Genetics Study

Jack Samuels et al.

493

## Continuing Medical Education

534

March 2007

Volume 164 • Number 3

Official Journal of the  
AMERICAN PSYCHIATRIC ASSOCIATION

[ajp.psychiatryonline.org](http://ajp.psychiatryonline.org)
