# THE AMERICAN JOURNAL OF PSYCHIATRY

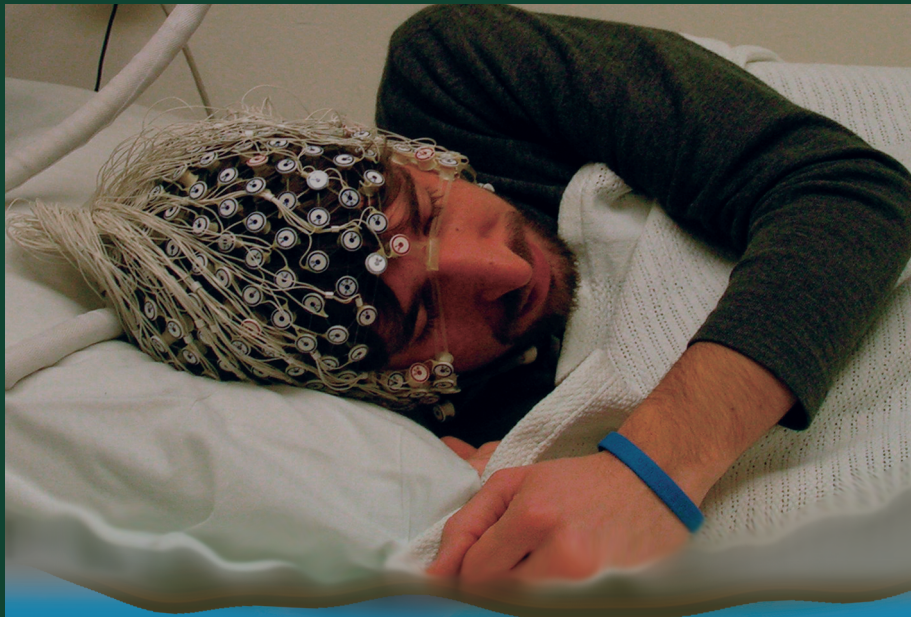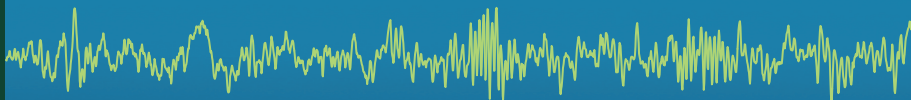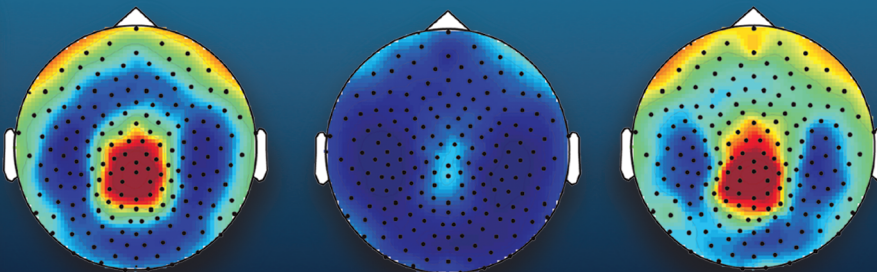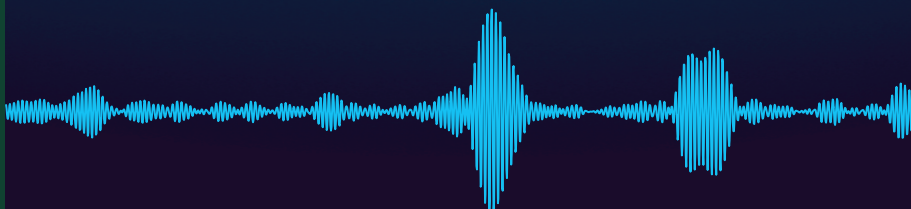

## Schizophrenia and Co-Occurring Substance Use Disorder

Alan I. Green et al. 402

## Effectiveness of Olanzapine, Quetiapine, and Risperidone in Patients With Chronic Schizophrenia After Discontinuing Perphenazine: A CATIE Study

T. Scott Stroup et al. 415

## Reduced Sleep Spindle Activity in Schizophrenia Patients

Fabio Ferrarelli et al. 483

## Significant Linkage to Compulsive Hoarding on Chromosome 14 in Families With Obsessive-Compulsive Disorder: Results From the OCD Collaborative Genetics Study

Jack Samuels et al. 493

Continuing Medical Education 534

March 2007

Volume 164 • Number 3

Official Journal of the  
AMERICAN PSYCHIATRIC ASSOCIATION

[ajp.psychiatryonline.org](http://ajp.psychiatryonline.org)

# THE AMERICAN JOURNAL OF PSYCHIATRY

Official Journal of the American Psychiatric Association

## Instructions for Activating Your Online Subscription

All subscribers to the print edition of *The American Journal of Psychiatry* are automatically eligible to view the *Journal* online. The online version of the *Journal* allows you to conduct searches for topics of interest in issues going all the way back to 1844. Plus the only way readers can participate in the *Journal's* new CME Course program is to have an activated online subscription (note: there is an additional annual fee to be enrolled and eligible to receive up to 36 hours of category 1 CME credit).

To activate your online subscription:

Make sure you have your customer identification number available. This number is printed on your *Journal* mailing label, directly above your name and address. If you cannot locate this number, please contact American Psychiatric Publishing, Inc., through one of the following methods:

- e-mail: [accessnumber@psych.org](mailto:accessnumber@psych.org)
- phone: (800) 368-5777
- fax: (703) 907-1091
- mail:

American Psychiatric Publishing, Inc.  
1000 Wilson Blvd., Suite 1825  
Arlington, VA 22209-3901  
Attn: Circulation Department.

Internet: <http://www.psychiatryonline.org>. Click on the "Subscriptions" button located near the bottom of the page. Then click on the appropriate link:

- ACTIVATE Your Member or Individual (Nonmember) Subscription

For APA Members, you will find your member number on the mailing label above your name. It is

a 10-digit number beginning with zeros. Enter your number in the box and click the SUBMIT button.

For Individual Nonmembers and Institutions, your customer number is on the mailing label above your name. It is a 10-digit number beginning with 22 or 30. Enter this number in the box and click the SUBMIT button.

Fill out all the information on the next screen and press the "Send Form" button at the bottom on the right.

When finished, click the "Done" button. You will receive an e-mail confirmation that your subscription has been activated.

**Continuing Medical Education:** You now have an opportunity to earn CME credits by reading articles in *The American Journal of Psychiatry*. Three articles in each issue will each comprise a short course for up to 1 hour category 1 CME credit each. The course comprises reading the article and answering three multiple-choice questions with a single correct answer. CME Credit is issued only online. Readers who want credit must subscribe to the AJP Continuing Medical Education Course program (APA Members: \$97.00 per year; Nonmember subscribers: \$144.00 per year; nonmember nonsubscribers: \$180.00 per year). Go to [cme.psychiatryonline.org](http://cme.psychiatryonline.org), select *The American Journal of Psychiatry* at that site, take the course(s) of your choosing, complete the evaluation form, and submit your answers for CME credit. In the online course, correct answers will be highlighted for your reference; there is no minimum threshold score necessary for the credit. A link from the question to the correct answer in context will be highlighted in the associated article. A certificate for each course will be generated upon successful completion.

The American Journal of Psychiatry is online at [ajp.psychiatryonline.org](http://ajp.psychiatryonline.org)

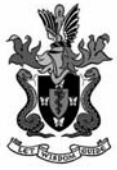

# THE BRITISH JOURNAL OF PSYCHIATRY

February 2007, VOL. 190

<http://bjp.rcpsych.org>

A4 Editorial Board

A5 Highlights of this issue

A6 Psychiatry in pictures

## EDITORIALS

91 Regulatory policies on medicines for psychiatric disorders: is Europe on target?

C. Barbu and S. Garattini

94 Mental health following terrorist attacks

M.G. Whalley and C.R. Brewin

## REVIEW ARTICLE

97 Psychological treatments for chronic post-traumatic stress disorder. Systematic review and meta-analysis

J.I. Bisson, A. Ehlers, R. Matthews, S. Pilling, D. Richards, and S. Turner

## PAPERS

105 Stability of early-phase primary psychotic disorders with concurrent substance use and substance-induced psychosis

C.L.M. Caton, D.S. Hasin, P.E. Shrout, R.E. Drake, B. Dominguez, M.B. First, S. Samet, and B. Schanzer

112 Lipids and essential fatty acids in patients presenting with self-harm

M.R. Garland, B. Hallahan, M. McNamara, P.A. Carney, H. Grimes, J.R. Hibbeln, A. Harkin, and R.M. Conroy

118 Omega-3 fatty acid supplementation in patients with recurrent self-harm. Single-centre double-blind randomised controlled trial

B. Hallahan, J.R. Hibbeln, J.M. Davis, and M.R. Garland

123 Treatment of social phobia: randomised trial of internet-delivered cognitive-behavioural therapy with telephone support

P. Carlbring, M. Gunnarsdóttir, L. Hedensjö, G. Andersson, L. Ekselius, and T. Furmark

129 Risk of hip fracture in patients with a history of schizophrenia

L. Howard, G. Kirkwood, and M. Leese

135 Phenomenology of delirium. Assessment of 100 adult cases using standardised measures  
D.J. Meagher, M. Moran, B. Raju, D. Gibbons, S. Donnelly, J. Saunders, and P.T. Trzepacz

142 Reducing emotional distress in people caring for patients receiving specialist palliative care. Randomised trial

K. Walsh, L. Jones, A. Tookman, C. Mason, J. McLoughlin, R. Blizard, and M. King

148 Best practice when service users do not consent to sharing information with carers. National multimethod study

M. Slade, V. Pinfold, J. Rapaport, S. Bellringer, S. Banerjee, E. Kuipers, and P. Huxley

156 Cancer risk among parents and siblings of patients with schizophrenia

I. Levav, I. Lipshitz, I. Novikov, I. Pugachova, R. Kohn, M. Barchana, A. Ponizovsky, and H. Werner

162 Neural correlates of the misattribution of speech in schizophrenia

P. Allen, E. Amaro, C.H.Y. Fu, S.C.R. Williams, M.J. Brammer, L.C. Johns, and P.K. McGuire

## SHORT REPORTS

170 Police contact within 3 months of suicide and associated health service contact

K.R. Linsley, N. Johnson, and J. Martin

172 Treatment adequacy for anxiety and depressive disorders in six European countries

A. Fernández, J.M. Haro, M. Martinez-Alonso, K. Demyttenaere, T.S. Brugha, J. Autonell, G. de Girolamo, S. Bernert, J.P. Lépine, and J. Alonso

174 Localisation of increased prefrontal white matter in pathological liars

Y. Yang, A. Raine, K.L. Narr, T. Lencz, L. LaCasse, P. Colletti, and A.W. Toga

## COLUMNS

176 Correspondence

179 One hundred years ago

180 Book reviews

186 Contents of the *American Journal of Psychiatry*

187 Contents of *Advances in Psychiatric Treatment*

188 From the Editor's desk

# Psychological Medicine

Volume 37 Number 2 February 2007

## CONTENTS

|                                                                                                                                                                                                                                                               |     |                                                                                                                                                                                                                                                         |     |
|---------------------------------------------------------------------------------------------------------------------------------------------------------------------------------------------------------------------------------------------------------------|-----|---------------------------------------------------------------------------------------------------------------------------------------------------------------------------------------------------------------------------------------------------------|-----|
| <b>In this Issue</b>                                                                                                                                                                                                                                          | 161 | <b>The genetic relationship between neuroticism and autonomic function in female twins</b> RIESE, H., ROSMALEN, J.G.M., ORMEL, J., VAN ROON, A.M., OLDEHINKEL, A.J., AND RIJSDIJK, F.V.                                                                 | 257 |
| <b>INVITED REVIEW</b>                                                                                                                                                                                                                                         |     |                                                                                                                                                                                                                                                         |     |
| <b>The endophenotype concept in psychiatric genetics</b><br>FLINT, J. AND MUNAFO, M.R.                                                                                                                                                                        | 163 | <b>Syndrome stability and psychological predictors of symptom severity in idiopathic environmental intolerance and somatoform disorders</b> BAILER, J., WITTHÖFT, M., BAYERL, C., AND RIST, F.                                                          | 271 |
| <b>ORIGINAL ARTICLES</b>                                                                                                                                                                                                                                      |     |                                                                                                                                                                                                                                                         |     |
| <b>Early childhood factors associated with the development of post-traumatic stress disorder: results from a longitudinal birth cohort</b> KOENEN, K.C., MOFFITT, T.E., POULTON, R., MARTIN, J., AND CASPI, A.                                                | 181 | <b>A randomized controlled clinical trial of a psychosocial and communication intervention carried out by GPs for patients with medically unexplained symptoms</b> AIARZAGUENA, J.M., GRANDES, G., GAMINDE, I., SALAZAR, A., SÁNCHEZ, A., AND ARIÑO, J. | 283 |
| <b>The correspondence between persistent self-reported post-traumatic problems and general practitioners' reports after a major disaster</b> DROGENDIJK, A.N., DIRKZWAGER, A.J.E., GRIEVINK, L., VAN DER VELDEN, P.G., MARCELISSSEN, F.G.H., AND KLEBER, R.J. | 193 |                                                                                                                                                                                                                                                         |     |
| <b>A randomized controlled study of single-session behavioural treatment of earthquake-related post-traumatic stress disorder using an earthquake simulator</b> BASOGLU, M., SALCIOGLU, E., AND LIVANOU, M.                                                   | 203 | <b>BOOK REVIEWS</b>                                                                                                                                                                                                                                     |     |
| <b>Shell shock: an outcome study of a First World War 'PIE' unit</b><br>JONES, E., THOMAS, A., AND IRONSIDE, S.                                                                                                                                               | 215 | <i>Adult Psychiatry</i> GRUENBERG, A.M.                                                                                                                                                                                                                 | 295 |
| <b>Is dissociative amnesia a culture-bound syndrome? Findings from a survey of historical literature</b> POPE JR., H.G., POLIAKOFF, M.G., PARKER, M.P., BOYNES, M., AND HUDSON, J.I.                                                                          | 225 | <i>Spirituality and the Healthy Mind: Science, Therapy, and the Need for Personal Meaning</i> HAFIZI, S.                                                                                                                                                | 296 |
| <b>Neural correlates of enhanced working-memory performance in dissociative disorder: a functional MRI study</b> ELZINGA, B.M., ARDON, A.M., HEIJNIS, M.K., DE RUITER, M.B., VAN DYCK, R., AND VELTMAN, D.J.                                                  | 235 | <i>Shorter Oxford Textbook of Psychiatry, 5th edition</i><br>MICHAEL, A.                                                                                                                                                                                | 297 |
| <b>Thresholds for health and thresholds for illness: panic disorder versus subthreshold panic disorder</b> BATELAAN, N., DE GRAAF, R., VAN BALKOM, A., VOLLEBERGH, W., AND BEEKMAN, A.                                                                        | 247 | <i>Cognitive Limitations in Aging and Psychopathology</i> ROISER, J.P.                                                                                                                                                                                  | 298 |
|                                                                                                                                                                                                                                                               |     | <i>Feeling Unreal: Depersonalization Disorder and the Loss of Self</i> SIERRA, M.                                                                                                                                                                       | 299 |
|                                                                                                                                                                                                                                                               |     | <i>Psychoses: An Integrative Perspective</i> BROOME, M.                                                                                                                                                                                                 | 300 |
|                                                                                                                                                                                                                                                               |     | <i>By Their Own Young Hand: Self-harm and Suicidal Ideas in Adolescents</i> JAFFA, T.                                                                                                                                                                   | 301 |
|                                                                                                                                                                                                                                                               |     | <b>Corrigendum</b>                                                                                                                                                                                                                                      | 269 |
|                                                                                                                                                                                                                                                               |     | <i>American Journal of Psychiatry</i><br>Contents October 2006                                                                                                                                                                                          | 303 |

# New Feature for Residents!

## The American Journal of Psychiatry Residents' Journal

A FREE electronic publication produced specifically for psychiatry residents

The Residents' Journal contains special links to full text of the articles from the current *American Journal of Psychiatry* and to AJP Audio, a downloadable MP3 file featuring highlights from the issue. In addition, this e-mail bulletin contains two exclusive features:

### Journal Club Kit

A featured article presented with an overview discussing the reasons for its selection, discussion questions, and an editorial by a senior member of the field placing the article into clinical context.

### Educational Article

Case presentation that illustrates a major point in clinical practice or highlights unique treatment approaches.

Plus lively contributions from your fellow residents:

- Instructive cases
- Unique clinical or educational programs
- Perspectives on training and career development
- Discussions arising from journal club discussions

**The American Journal of Psychiatry**  
**Residents' Journal**  
February 2007, Volume 2, Issue 2

**Contents**

**Residents Treating Schizophrenia: Improving Sense of Effectiveness**  
Eufemina F. Maloy FGY2 2

**Should We Use Law Enforcement for Emergency Transportation of People With Mental Illness?**  
Andrew R. Kaufman FGY3 3

**Editors' Column**

In our initial focus group at the 2006 ATA Annual Meeting, residents asked for commentary from the editors on how to read articles that appear in the *Journal*. In response to this request, we published the first Editors' Column in October 2006, wherein we provided an overview of the relationship of articles to other features of the *Journal*. The feature in *The Reside* gives you a quick summary of an article, and the accompanying editorial provides commentary to help place the article into context, guide you to its strengths and limitations, and then present a clinical message from the article's result. The second Editor's Column, published in December 2006, provided information about the methods of clinical trials, including how patients are enrolled and how the study is conducted ethically. This month we will discuss how to directly approach an article in order to discern for yourself what has been discovered. For our example we will use Milled et al.'s "A Randomized Controlled Clinical Trial of Psychoanalytic Psychotherapy for Post-Traumatic Stress Disorder" from the February 2007 issue of the *American Journal of Psychiatry*. A link to this article and an editorial on clinical trials for psychotherapy by Arthur Etkin is in this issue of the Residents' Journal.

According to David Lentz, one of our Deputy Editors, there are two definitive questions he asks of an article: "Am I interested?" and "Am I concerned?" You could try to answer the first question by reading the abstract, but don't tend to be very concerned, because they are written for doubling purposes (e.g., PubMed). The abstracts often immerse you into a sea of unfamiliar references to other papers. Many residents try the *Abstract* section first, because that is familiar territory. Within the descriptions of patient evaluations in the *Abstract*, you can see yourself disagreeing about and assessing their symptoms. The *Reside* uses often a mass of studies for most papers (we will tackle that problem later). Therefore, it may be most helpful to move to the *Discussion*, usually the last section, which for the Milled et al. article begins on page 270 in the February issue. The first paragraph of the *Discussion* is a good place in which to find an answer to the question, "Am I interested?"

The first paragraph of the *Discussion* is the authors' opportunity to tell us what they believe they have discovered. For instance, Dr. Milled and her colleagues tell us that this is the first study to show that psychoanalytic psychotherapy is effective for the treatment of panic attacks, as well as for treating the phobic avoidance that people who suffer from panic attacks often develop. I have personally treated people who suffer from panic attacks, and I know that they are often quite difficult to treat. Therefore, as a clinician, this article is of particular interest to me. Now the question is, can the article convince me?

To be convinced that a finding is true, some readers may think that the answer can be found through a careful reading of the *Abstract*, but the *Reside* is often a better choice, because therein the data can be found. If it is not clear how the data were acquired or analyzed, then clarification can be found in the *Abstract* in the Milled et al. article, we can learn a lot from the first paragraph of the *Reside*. The authors employed two treatments: 1) panic-focused psychodynamic therapy and 2) applied relaxation. At this point it may be necessary to consult elsewhere to find out more about the therapies used and also about the four scales that we used to measure the results in this study. Readers frequently give up at this point, because the various therapies and scales discussed are often unfamiliar. However, there are two things we here at the *Journal* do to help you first: if you read the full-text version online, you can click on a reference and it will take you to MEDLINE or to a full-text version of the article describing the scale in question. That is okay if you want to go into the article in some depth, but you can end up with a lot of windows open on your screen. An alternative, unique to the *American Journal of Psychiatry*, is a *Reside Response*. We do not adhere to the story of a patient in the study, so that you can read a clinical description of a patient, the treatment that was given, and its results. Generally, this feature appears as a figure at the end of the *Reside*.

To continue with the Milled et al. article, the second section of the *Reside* then gives the general result of the study, the comparison in treatment effects between the two therapies. Here we are concerned with seeing that there is significant difference between the two treatments. What we are looking for specifically is a predefined measure of effectiveness that makes sense clear.

1

The Resident's Journal is sent free-of-charge to all psychiatry residents. Anyone interested in being included on the distribution list should contact Lisa Devine, the Residents' Journal staff editor at [ajp@psych.org](mailto:ajp@psych.org) with "Subscribe to Residents' Journal" in the subject line.



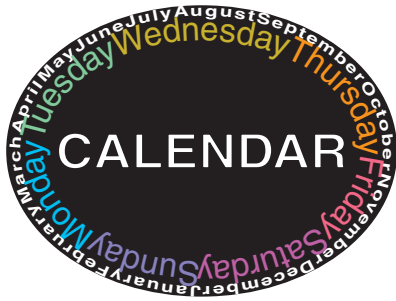

For free listing of your organization's official annual or regional meeting, please send us the following information: sponsor, location, inclusive dates, type and number of continuing education credits (if available), and the name, address, and telephone number of the person or group to contact for more information. In order for an event to appear in our listing, all notices and changes must be received at least 6 months in advance of the meeting and should be addressed to:

*Calendar, American Journal of Psychiatry, 1000 Wilson Boulevard, Suite 1825, Arlington, VA 22209-3901, jblair@psych.org (e-mail).*

*Because of space limitations, only listings of meetings of the greatest interest to Journal readers will be included.*

## MARCH

**March 1–4**, 20th Annual Meeting of the American Association for Geriatric Psychiatry, New Orleans. Contact: AAGP, 7910 Woodmont Ave., Ste. 1050, Bethesda, MD 20814-3004; (301) 654-7850 (tel), (301) 654-4137 (fax), [www.aagp-meeting.org](http://www.aagp-meeting.org) (web site).

**March 6**, American Association for Emergency Psychiatry will offer a series of 9 web-based conferences in 2007 starting on March 6. Contact: American Association for Emergency Psychiatry, One Regency Drive, P.O. Box 30, Bloomfield, CT 06002; (888) 945-5430 (tel) [www.emergencypsychiatry.org](http://www.emergencypsychiatry.org) (web site).

**March 17–21**, 15th European Congress of Psychiatry, Madrid. Contact: Kenes International – Global Congress Organisers and Association Management Services, 17 Rue du Cendrier, PO Box 1726, CH-1211 Geneva 1, Switzerland; (41) 22 908 0488 (tel), (41) 22 732 2850 (fax), [aep2007@kenes.com](mailto:aep2007@kenes.com) (e-mail), [www.kenes.com/aep2007](http://www.kenes.com/aep2007) (web site).

**March 30-Apr 1**, 33rd Annual American Academy of Clinical Psychiatrists Conference, Washington, DC. Contact: American Academy of Clinical Psychiatrists, P.O. Box 458, Glastonbury, CT 06033-0458; (860) 833-5045 (tel), (860) 833-6023 (fax), [aacp@cox.net](mailto:aacp@cox.net) (e-mail), [www.aacp.com](http://www.aacp.com) (web site).

## APRIL

**April 18–21**, 28th Annual Meeting and Scientific Sessions of the Society of Behavioral Medicine, Miami Beach. Contact: Society of Behavioral Medicine, 17000 Commerce Parkway, Ste. C, Mount Laurel, NJ 08054; (856) 439-1297 (tel), (856) 439-0525 (fax), [info@sbm.org](mailto:info@sbm.org) (e-mail).

**April 26–29**, 25th Annual Symposium of the American College of Forensic Psychiatry, Santa Fe, NM. Contact: American College of

Forensic Psychiatry, P.O. Box 5870, Balboa Island, CA 92662; (949) 673-7773 (tel), (949) 673-7710 (fax), [psychlaw@sover.net](mailto:psychlaw@sover.net) (e-mail), [www.forensicpsychonline.com](http://www.forensicpsychonline.com) (web site).

## MAY

**May 17–20**, The 51st Annual Meeting of the American Academy of Psychoanalysis and Dynamic Psychiatry, San Diego. Contact: Executive Office, American Academy of Psychoanalysis and Dynamic Psychiatry, P. O. Box 30, Bloomfield, CT 06002; (888) 691-8281 (tel), (888) 286-0787 (fax), [aap@ssmgt.com](mailto:aap@ssmgt.com) (e-mail), [www.aapdp.org](http://www.aapdp.org) (web site).

**May 19–24**, 160th Annual Meeting of the American Psychiatric Association, San Diego. Contact: Cathy Nash, APA Annual Meetings Dept., 1000 Wilson Blvd., Ste. 1825, Arlington, VA 22209; (703) 907-7822.

## JUNE

**June 6–8**, WPA Thematic Conference, Dresden, Germany. Contact: Anett Reimann, Intercom Dresden GmbH, Zelle-scher Weg 3, 01069 Dresden, Germany; 49 (351) 4633 3014 (tel), 49 (351) 4633 7049 (fax), [areimann@intercom.de](mailto:areimann@intercom.de) (e-mail), [www.wpa2007dresden.org](http://www.wpa2007dresden.org) (web site).

## OCTOBER

**October 6–7**, 6th NYU Reproductive Psychiatry Conference, New York. Contact: Dr. Shari I. Lusskin, Director of Reproductive Psychiatry, New York University School of Medicine, 155 East 29th Street, Suite 26J, New York, NY 10016; (212) 263-5295 (tel), [www.med.nyu.edu/cme](http://www.med.nyu.edu/cme) (web site).

**October 7–11**, 15th World Congress on Psychiatric Genetics, New York. Contact: Lynn E DeLisi, International Society of Psychiatric Genetics, NYU School of Medicine, 650 First Avenue, 5th Floor Room 543, New York, NY 10016; (212) 263-3420 (tel), (212) 263-3407 (fax), [DeLisi76@AOL.com](mailto:DeLisi76@AOL.com) (e-mail), [www.WCPG2007.com](http://www.WCPG2007.com) (web site).

**October 11-14**, 59th Institute on Psychiatric Services, American Psychiatric Association, New Orleans, LA. Contact: Jill Gruber, APA Annual Meetings Dept., 1000 Wilson Blvd., Ste. 1825, Arlington, VA 22209; (703) 907-7815.

**October 12-15**, Annual Meeting of the Society for the Study of Psychiatry and Culture (SSPC), Hyatt Regency Capitol Hill, Washington, DC. Contact: Jim Boehnlein or Shannon Squire, (503) 220-3481, [shannon.squire@med.va.gov](mailto:shannon.squire@med.va.gov) (e-mail).

**October 23–28**, 54th Annual Meeting of the American Academy of Child and Adolescent Psychiatry, Boston. Contact: AACAP, 3615 Wisconsin Avenue, N.W., Washington, DC 20016-3007; (202) 966-7300 (tel), (202) 966-2891 (fax), [meetings@aacap.org](mailto:meetings@aacap.org) (e-mail), [www.aacap.org](http://www.aacap.org) (web site).

## FEBRUARY 2008

**February 15–18**, 21st Annual Meeting of the American Association for Geriatric Psychiatry, Washington, DC. Contact: AAGP, 7910 Woodmont Ave., Ste. 1050, Bethesda, MD 20814-3004; (301) 654-7850 (tel), (301) 654-4137 (fax), [www.aagpmeeting.org](http://www.aagpmeeting.org) (web site).

**February 27–March 2**, Annual meeting of the American College of Psychiatrists, Kauai, Hawaii. Contact: American College of Psychiatrists, 122 S. Michigan Ave., Ste. 1360, Chicago, IL 60603; (312) 662-1020 (tel), (312) 662-1025 (fax), [maureen@acpsych.org](mailto:maureen@acpsych.org) (e-mail).

*Continued on page A63*

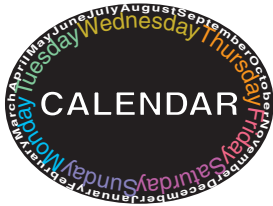

Continued from page A50

## MAY

**May 1–4**, The 52nd Annual Meeting of the American Academy of Psychoanalysis and Dynamic Psychiatry, Washington, DC. Contact: Executive Office, American Academy of Psychoanalysis and Dynamic Psychiatry, P. O. Box 30, Bloomfield, CT 06002; (888) 691-8281 (tel), (888) 286-0787 (fax), aap@ssmgt.com (e-mail).

**May 3–8**, 161st Annual Meeting of the American Psychiatric Association, Washington, DC. Contact: Cathy Nash, APA Annual Meetings Dept., 1000 Wilson Blvd., Ste. 1825, Arlington, VA 22209; (703) 907-7822.

## CONTENTS (Continued from page A5)

### Cover

Ferrarelli et al. (p. 483) used high-density electroencephalography (hd-EEG) during sleep to study abnormalities in sleep-specific EEG rhythms. Schizophrenia subjects were found to have deficits in sleep spindles, bursts of EEG activity generated by the thalamic reticular nucleus in conjunction with specific thalamocortical structures. Low sleep spindle activity indicates dysfunction in these structures, which are involved in attention during waking. Six articles in this issue that examine new imaging techniques to identify abnormalities of brain activity in schizophrenia are discussed in the editorial by Freedman (p. 385). Cover images provided by Dr. Ferrarelli. Cover design by Jason Glance.

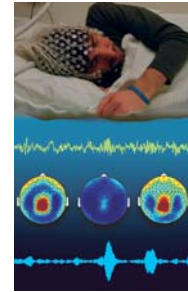

## OCTOBER

**October–November 2**, 55th Annual Meeting of the American Academy of Child and Adolescent Psychiatry, Chicago. Contact: AACAP, 3615 Wisconsin Avenue, N.W., Washington, DC 20016-3007; (202) 966-7300 (tel), (202) 966-2891 (fax), meetings@aacap.org (e-mail), www.aacap.org (web site).

## Coming in the April 2007 issue

### THE AMERICAN JOURNAL OF PSYCHIATRY

#### *Twelve Month Outcome of Adolescents With Bipolar Disorder Following First Hospitalization for a Manic or Mixed Episode*

M.P. DelBello, D. Hanseman, C.M. Adler, D. Fleck, J. Amicone, and S.M. Strakowski

#### *A Randomized Controlled Trial of Family Therapy and Cognitive Behavior Guided Self-Care for Adolescents With Bulimia Nervosa and Related Disorders*

U. Schmidt, S. Lee, J. Beecham, S. Perkins, J. Treasure, I. Yi, S. Winn, P. Robinson, R. Murphy, S. Keville, E. Johnson-Sabine, M. Jenkins, S. Frost, L. Dodge, M. Berelowitz, and I. Eisler

#### *Neural Responses to Happy Facial Expressions in Major Depression Following Antidepressant Treatment*

C.H.Y. Fu, S.C.R. Williams, M.J. Brammer, J. Suckling, J. Kim, A.J. Cleare, N.D. Walsh, M.T. Mitterschiffthaler, C. Andrew, E.M. Pich, and E.T. Bullmore

#### *Neural Evidence for Enhanced Error Detection in Major Depressive Disorder*

P.H. Chiu and P.J. Deldin
